# Supplementary material for: Decrease in PSCA expression caused by Helicobacter pylori infection may promote progression to severe gastritis
Source: PubMed Central journal article supplement (PMC5790512; doi:10.18632/oncotarget.23278), 2017-12-14
Supplement: oncotarget-09-3936-s001.pdf [file oncotarget-09-3936-s001.pdf]

## Decrease in *PSCA* expression caused by *Helicobacter pylori* infection may promote progression to severe gastritis

### SUPPLEMENTARY MATERIALS

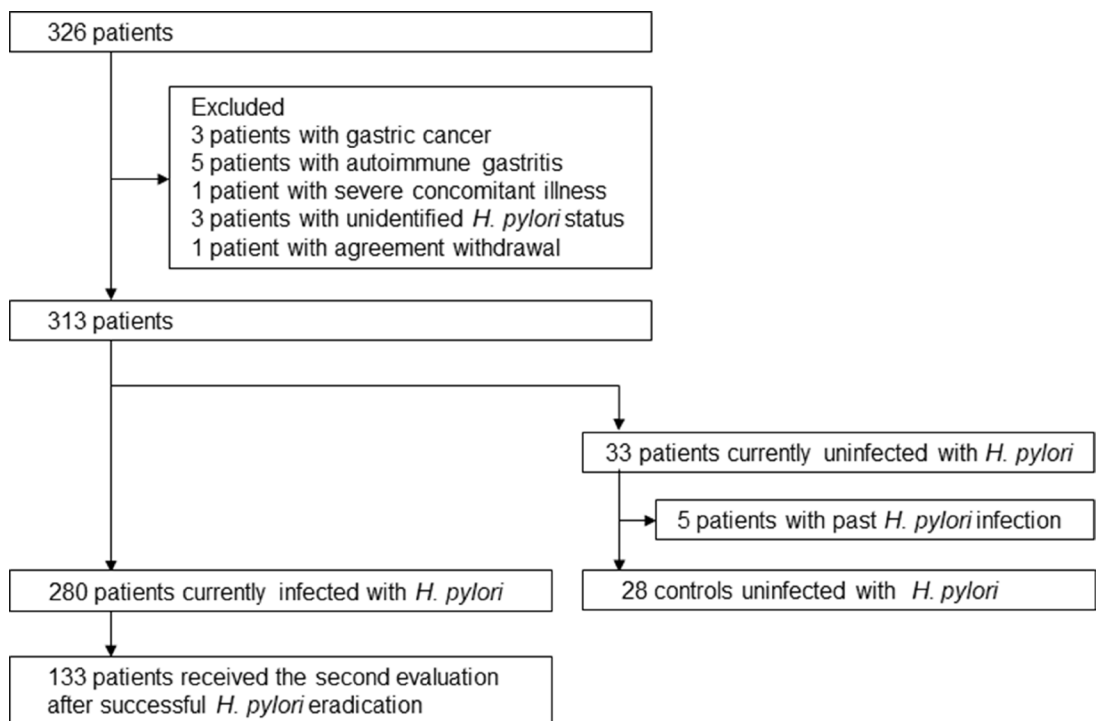

Supplementary Figure 1: Flowchart of inclusion and exclusion criteria of patients who underwent esophagogastroduodenoscopy.

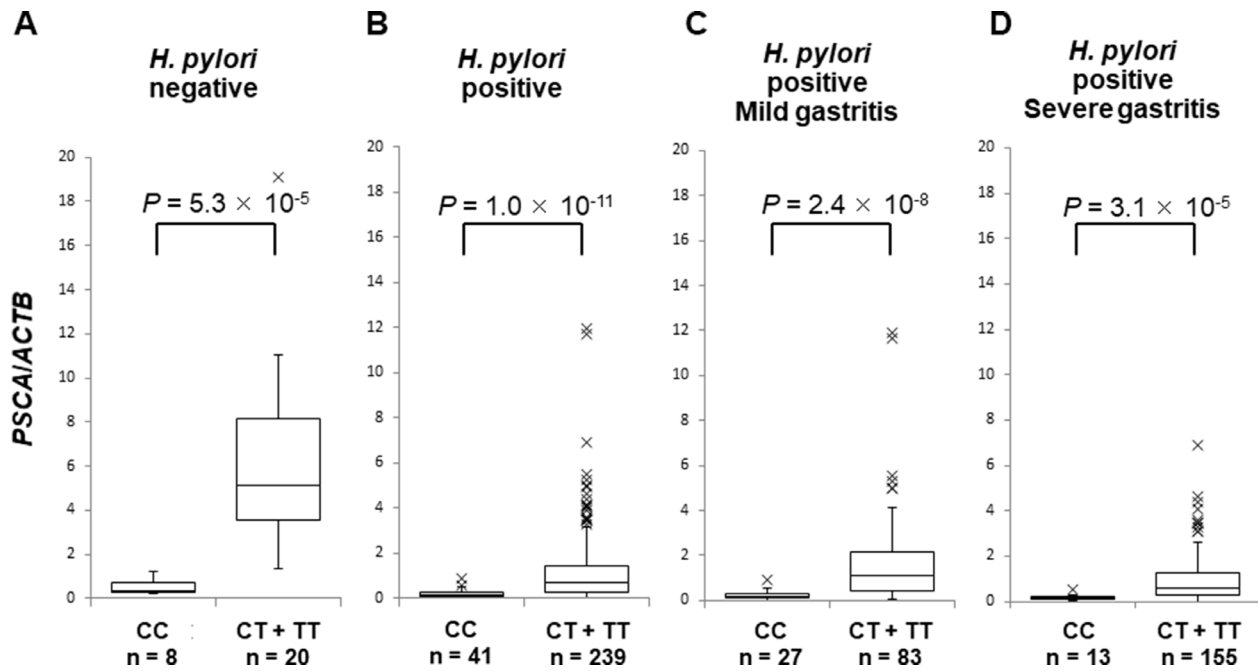

**Supplementary Figure 2: The association of SNP rs2294008 with PSCA expression.** Box-plots with medians for PSCA expression normalized to ACTB in biopsy samples of gastric mucosa. The P values were calculated by a Mann-Whitney *U*-test. (A) PSCA mRNA in *H. pylori*-negative controls ( $n = 28$ ), (B) in *H. pylori*-infected patients ( $n = 280$ ), (C) in *H. pylori*-infected mild gastritis patients ( $n = 110$ ), (D) and in *H. pylori*-infected severe gastritis patients ( $n = 168$ ).

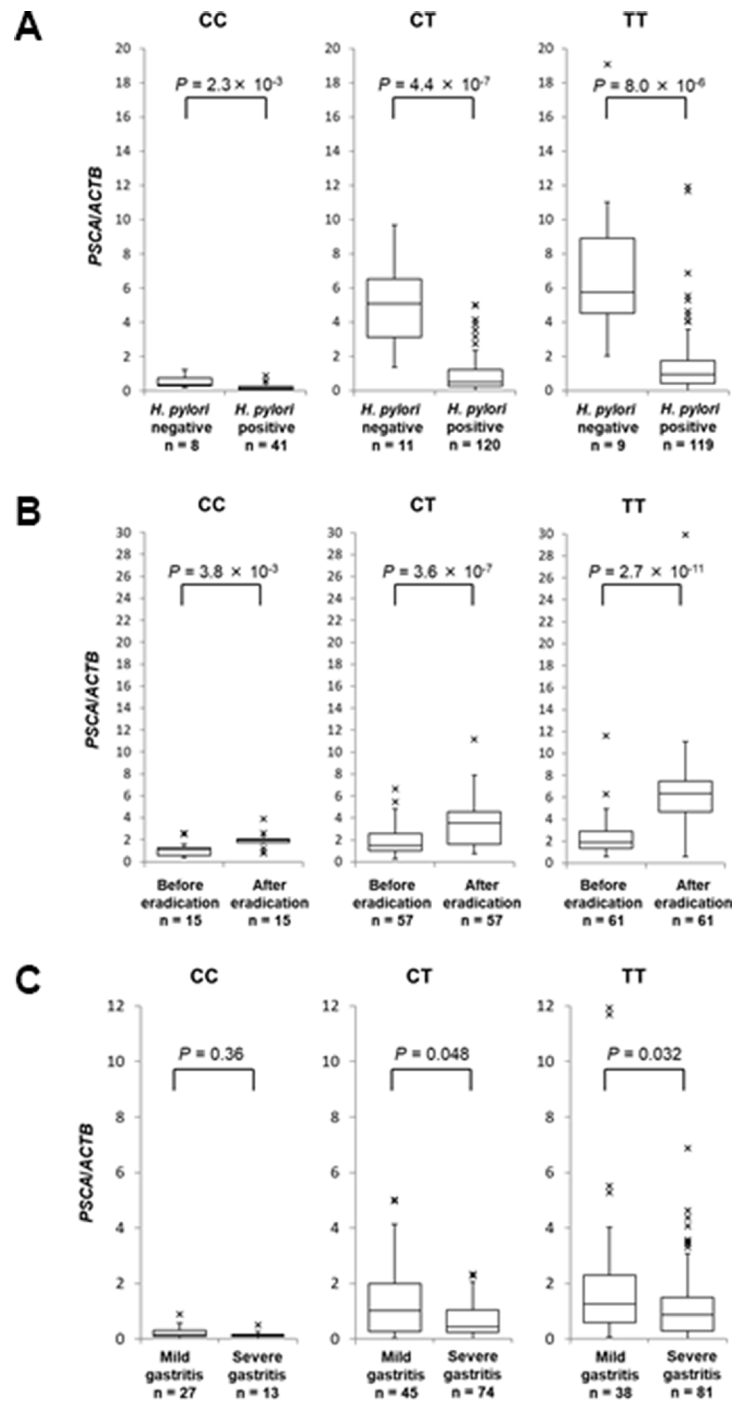

**Supplementary Figure 3: The host-bacterial interaction in the regulation of PSCA expression.** Box-plots with medians for PSCA expression normalized to ACTB in biopsy samples of gastric mucosa. The P values were calculated by a Mann-Whitney *U*-test. (A) The subgroup analysis of PSCA mRNA compared between *H. pylori*-negative controls ( $n = 28$ ) and *H. pylori*-infected patients ( $n = 280$ ). (B) The subgroup analysis of PSCA mRNA compared before and after *H. pylori* eradication ( $n = 133$ ). (C) The subgroup analysis of PSCA mRNA compared between *H. pylori*-infected patients with mild gastritis ( $n = 110$ ) and those with severe gastritis ( $n = 168$ ).

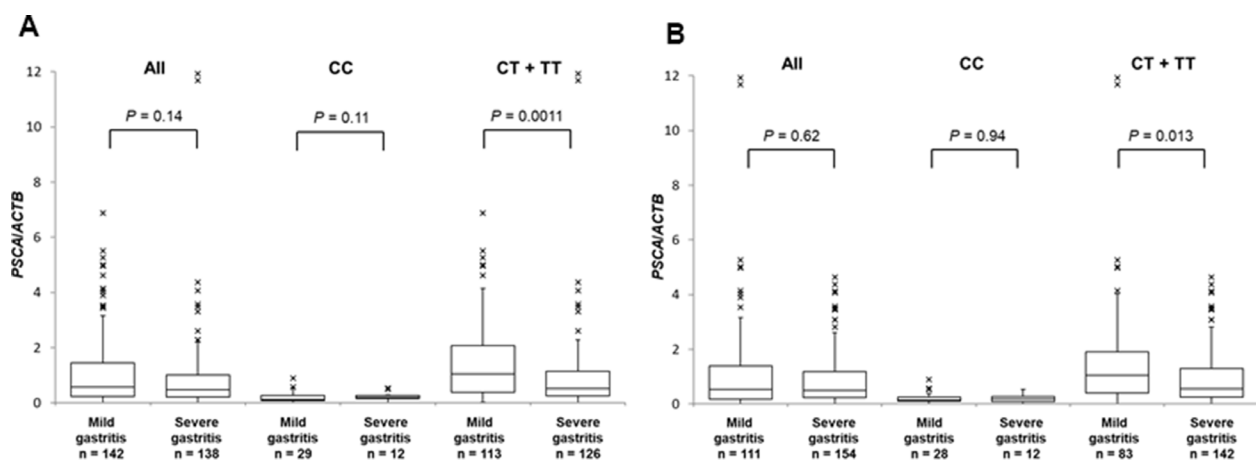

**Supplementary Figure 4: The genotype-specific impact of *PSCA* expression in the development of severe gastritis.** Box-plots with medians for *PSCA* expression normalized to *ACTB* in biopsy samples of gastric mucosa. The *P* values were calculated by a Mann-Whitney U-test. **(A)** By endoscopic evaluation, the subgroup analysis of *PSCA* mRNA compared between *H. pylori*-infected patients with mild gastritis ( $n = 142$ ) and those with severe gastritis ( $n = 138$ ). **(B)** By serological evaluation, the subgroup analysis of *PSCA* mRNA compared between *H. pylori*-infected patients with mild gastritis ( $n = 111$ ) and those with severe gastritis ( $n = 154$ ).

### Supplementary Table 1: Proportion of gastritis

|                            | <i>H. pylori</i> -negative controls | <i>H. pylori</i> -infected | <i>P</i> value <sup>a</sup> | Before/after <sup>b</sup> | <i>P</i> value <sup>a</sup> |
|----------------------------|-------------------------------------|----------------------------|-----------------------------|---------------------------|-----------------------------|
| Histological gastritis (%) |                                     |                            | $1.7 \times 10^{-9}$        |                           | $6.8 \times 10^{-31}$       |
| Mild                       | 27 (100)                            | 110 (40)                   |                             | 41/129                    |                             |
| Severe                     | 0                                   | 168 (60)                   |                             | 88/0                      |                             |
| Endoscopic gastritis (%)   |                                     |                            | $8.6 \times 10^{-4}$        |                           | 0.013                       |
| Mild                       | 24 (86)                             | 142 (51)                   |                             | 52/72                     |                             |
| Severe                     | 4 (14)                              | 138 (49)                   |                             | 79/59                     |                             |
| Serological gastritis (%)  |                                     |                            | $4.7 \times 10^{-8}$        |                           | $5.3 \times 10^{-19}$       |
| Mild                       | 25 (100)                            | 111 (42)                   |                             | 33/95                     |                             |
| Severe                     | 0                                   | 154 (58)                   |                             | 70/8                      |                             |

We analyzed 28 *H. pylori*-negative controls and 280 *H. pylori*-infected patients. <sup>a</sup>*P* values were calculated by chi-square test. Among 280 *H. pylori*-infected patients, 133 patients (129 by histology, 131 by endoscopy, and 103 by serology, respectively) were evaluated more than 6 months after *H. pylori* eradication<sup>b</sup>.

### Supplementary Table 2: Frequency of PSCA rs2294008 SNP in *H. pylori* infection-gastritis-gastric cancer sequence evaluated by endoscopy or serology

| Cases                       | Controls           | Cases |       |       | Controls |     |     | T vs C                       |                          | TT + TC vs CC                |                          |
|-----------------------------|--------------------|-------|-------|-------|----------|-----|-----|------------------------------|--------------------------|------------------------------|--------------------------|
|                             |                    | CC    | CT    | TT    | CC       | CT  | TT  | <i>P</i> -value <sup>a</sup> | OR <sup>b</sup> (95% CI) | <i>P</i> -value <sup>c</sup> | OR <sup>d</sup> (95% CI) |
| SG, Endoscopy, Hp+          | MG, Endoscopy, Hp+ | 12    | 60    | 66    | 29       | 60  | 53  | 0.013                        | 1.62 (0.99–2.66)         | $5.5 \times 10^{-3}$         | 2.69 (1.31–5.53)         |
| SG, Serology, Hp+           | MG, Serology, Hp+  | 12    | 69    | 73    | 28       | 44  | 39  | $1.9 \times 10^{-3}$         | 1.82 (1.27–2.60)         | $9.2 \times 10^{-5}$         | 3.99 (1.92–8.27)         |
| SG, Endoscopy, Hp+          | Hp- controls       | 12    | 60    | 66    | 73       | 275 | 189 | $4.8 \times 10^{-3}$         | 1.47 (1.11–1.96)         | 0.12                         | 1.65 (0.87–3.14)         |
| SG, Serology, Hp+           | Hp- controls       | 12    | 69    | 73    | 73       | 275 | 189 | $6.3 \times 10^{-4}$         | 1.59 (1.20–2.11)         | 0.090                        | 1.73 (0.91–3.28)         |
| Gastric cancer <sup>e</sup> | SG, Endoscopy, Hp+ | 201   | 1,087 | 1,041 | 12       | 60  | 66  | 0.53                         | 0.93 (0.72–1.21)         | 0.98                         | 1.01 (0.55–1.85)         |
| Gastric cancer <sup>e</sup> | SG, Serology, Hp+  | 201   | 1,087 | 1,041 | 12       | 69  | 73  | 0.50                         | 0.92 (0.72–1.18)         | 0.72                         | 0.89 (0.49–1.64)         |

SG: severe gastritis, MG: mild gastritis. Hp+: *H. pylori* positive, Hp-: *H. pylori* negative. <sup>a</sup>*P* values are calculated by two-sided Cochran-Armitage test. <sup>b</sup>ORs are calculated by considering the C allele as a reference. <sup>c</sup>*P* values are calculated by chi-square test. <sup>d</sup>ORs were calculated by considering the CC genotype as a reference. <sup>e</sup>Data from the previous study (Tanikawa et al. 2012 Nature Genetics)<sup>11</sup>.
